# Supplementary material for: Three new solvent-directed 3D lead(ii)–MOFs displaying the unique properties of luminescence and selective CO2 sorption
Source: Royal Society of Chemistry journal article supplement (doi:10.1039/c3dt51203g), 2013-01-01
Supplement: c3dt51203g.pdf [file c3dt51203g.pdf]

## Supporting Information

### Three new solvent-directed 3D lead(II)–MOFs displaying the unique properties of luminescence and selective CO<sub>2</sub> sorption

Jiang Li, Guoping Yang, Lei Hou, Lin Cui, Yuanpu Li, Yao-Yu Wang,\* and Qi-Zhen Shi

Table S1. Crystallographic Data of 1–3.

| Complex                                                                                               | 1                                                                             | 2                                                                              | 3                                                              |
|-------------------------------------------------------------------------------------------------------|-------------------------------------------------------------------------------|--------------------------------------------------------------------------------|----------------------------------------------------------------|
| Empirical formula                                                                                     | C <sub>20</sub> H <sub>10</sub> N <sub>6</sub> Pb <sub>2</sub> O <sub>8</sub> | C <sub>30</sub> H <sub>14</sub> N <sub>9</sub> Pb <sub>3</sub> O <sub>12</sub> | C <sub>10</sub> H <sub>4</sub> N <sub>3</sub> PbO <sub>5</sub> |
| Formula weight                                                                                        | 876.72                                                                        | 1314.10                                                                        | 453.36                                                         |
| Crystal system                                                                                        | Orthorhombic                                                                  | Monoclinic                                                                     | Tetragonal                                                     |
| Space group                                                                                           | <i>Pbca</i>                                                                   | <i>P2<sub>1</sub>/c</i>                                                        | <i>I4<sub>1</sub>/a</i>                                        |
| <i>T</i> /K                                                                                           | 296(2)                                                                        | 296(2)                                                                         | 296(2)                                                         |
| <i>a</i> /Å                                                                                           | 15.506(17)                                                                    | 15.3197(14)                                                                    | 17.262(8)                                                      |
| <i>b</i> /Å                                                                                           | 11.458(7)                                                                     | 15.6843(15)                                                                    | 17.262(8)                                                      |
| <i>c</i> /Å                                                                                           | 24.859(3)                                                                     | 15.1838(14)                                                                    | 21.956(10)                                                     |
| <i>α</i> /°                                                                                           | 90                                                                            | 90                                                                             | 90                                                             |
| <i>β</i> /°                                                                                           | 90                                                                            | 116.386                                                                        | 90                                                             |
| <i>γ</i> /°                                                                                           | 90                                                                            | 90                                                                             | 90                                                             |
| <i>V</i> /Å <sup>3</sup>                                                                              | 4416.7(9)                                                                     | 3268.3(5)                                                                      | 6542(5)                                                        |
| <i>Z</i>                                                                                              | 8                                                                             | 4                                                                              | 16                                                             |
| <i>D<sub>c</sub></i> /g·cm <sup>-3</sup>                                                              | 2.637                                                                         | 2.768                                                                          | 1.776                                                          |
| <i>μ</i> /mm <sup>-1</sup>                                                                            | 15.290                                                                        | 15.472                                                                         | 10.322                                                         |
| Reflns collected                                                                                      | 20156                                                                         | 16284                                                                          | 18375                                                          |
| Reflns unique                                                                                         | 3932                                                                          | 5811                                                                           | 3486                                                           |
| R <sub>int</sub>                                                                                      | 0.0895                                                                        | 0.0559                                                                         | 0.0487                                                         |
| GOF                                                                                                   | 1.068                                                                         | 0.934                                                                          | 1.036                                                          |
| <i>R</i> <sub>1</sub> <sup>a</sup> , <i>wR</i> <sub>2</sub> <sup>b</sup> [ <i>I</i> > 2σ( <i>I</i> )] | 0.0573,0.1584                                                                 | 0.0392,0.1034                                                                  | 0.0318,0.0980                                                  |
| <i>R</i> <sub>1</sub> , <i>wR</i> <sub>2</sub> (all data)                                             | 0.0663,0.1751                                                                 | 0.0642,0.1368                                                                  | 0.0476,0.1032                                                  |

**Table S2.** Selected bond lengths (Å) and bond angles (°) for **1–3**

| Compound 1          |           |                     |           |
|---------------------|-----------|---------------------|-----------|
| Pb(1)–N(5)#1        | 2.407(9)  | Pb(1)–N(1)          | 2.464(11) |
| Pb(1)–N(6)#1        | 2.501(11) | Pb(1)–O(6)          | 2.654(9)  |
| Pb(1)–O(1)          | 2.712(9)  | Pb(1)–N(3)          | 2.904(9)  |
| Pb(2)–O(4)#2        | 2.423(8)  | Pb(2)–O(5)          | 2.483(9)  |
| Pb(2)–N(2)#2        | 2.537(10) | Pb(2)–N(4)          | 2.650(10) |
| Pb(2)–O(3)#3        | 2.735(9)  | Pb(2)–O(8)          | 2.837(11) |
| N(5)#1–Pb(1)–N(1)   | 128.4(3)  | N(5)#1–Pb(1)–N(6)#1 | 66.1(3)   |
| N(1)–Pb(1)–N(6)#1   | 84.3(4)   | N(5)#1–Pb(1)–O(6)   | 77.7(3)   |
| N(1)–Pb(1)–O(6)     | 133.1(3)  | N(6)#1–Pb(1)–O(6)   | 71.8(3)   |
| N(5)#1–Pb(1)–O(1)   | 74.4(3)   | N(1)–Pb(1)–O(1)     | 62.4(3)   |
| N(6)#1–Pb(1)–O(1)   | 87.5(3)   | O(6)–Pb(1)–O(1)     | 150.3(3)  |
| N(1)–Pb(1)–N(3)     | 58.71(4)  | O(6)–Pb(1)–N(3)     | 78.84(3)  |
| N(3)–Pb(1)–N(6) #1  | 84.62(3)  | N(3)–Pb(1)– N(5)#1  | 147.80(3) |
| O(1)– Pb(1)– N(3)   | 121.09(3) | O(4)#2–Pb(2)–N(4)   | 76.2(3)   |
| O(4)#2–Pb(2)–O(5)   | 74.7(3)   | O(4)#2–Pb(2)–N(2)#2 | 68.4(3)   |
| O(5)–Pb(2)–N(4)     | 65.6(3)   | N(2)#2–Pb(2)–N(4)   | 115.1(3)  |
| O(4)#2–Pb(2)–O(3)#3 | 123.3(3)  | O(5)–Pb(2)–O(3)#3   | 107.1(3)  |
| N(2)#2–Pb(2)–O(3)#3 | 78.1(3)   | N(4)–Pb(2)–O(3)#3   | 160.4(3)  |
| O(8)–Pb(2)–O(3)#3   | 75.67(3)  | O(8)–Pb(2)–N(4)     | 74.59(3)  |
| O(5)–Pb(2)–O(8)     | 175.10(3) | O(4)–Pb(2)–O(8)     | 110.51(3) |
| O(5)–Pb(2)–N(2)#2   | 74.7(3)   |                     |           |
| Compound 2          |           |                     |           |
| Pb(1)–N(6)#1        | 2.374(10) | Pb(1)–O(4)          | 2.496(8)  |
| Pb(1)–O(5)          | 2.693(9)  | Pb(1)–O(1)#2        | 2.700(9)  |
| Pb(1)–N(4)#1        | 2.744(12) | Pb(1)–N(3)          | 2.756(9)  |
| Pb(2)–N(9)          | 2.346(10) | Pb(2)–O(8)          | 2.400(8)  |
| Pb(2)–N(7)          | 2.647(11) | Pb(2)–N(5)          | 2.709(10) |

---

|                     |           |                     |           |
|---------------------|-----------|---------------------|-----------|
| Pb(2)–O(9)          | 2.889(10) | Pb(3)–N(2)#3        | 2.333(9)  |
| Pb(3)–O(12)         | 2.399(9)  | Pb(3)–N(8)          | 2.616(10) |
| Pb(3)–N(1)#3        | 2.732(10) | Pb(3)–O(1)          | 2.862(10) |
| Pb(3)–O(5)          | 2.898(11) |                     |           |
| N(6)#1–Pb(1)–O(4)   | 74.7(3)   | N(6)#1–Pb(1)–O(5)   | 90.3(3)   |
| O(4)–Pb(1)–O(5)     | 164.1(3)  | N(6)#1–Pb(1)–O(1)#2 | 113.0(3)  |
| O(4)–Pb(1)–O(1)#2   | 84.6(3)   | O(5)–Pb(1)–O(1)#2   | 96.8(3)   |
| N(6)#1–Pb(1)–N(4)#1 | 62.9(3)   | O(4)–Pb(1)–N(4)#1   | 77.3(3)   |
| O(5)–Pb(1)–N(4)#1   | 100.9(3)  | O(1)#2–Pb(1)–N(4)#1 | 161.9(3)  |
| N(6)#1–Pb(1)–N(3)   | 125.0(3)  | O(4)–Pb(1)–N(3)     | 63.8(3)   |
| O(5)–Pb(1)–N(3)     | 131.3(3)  | O(1)#2–Pb(1)–N(3)   | 97.8(3)   |
| N(4)#1–Pb(1)–N(3)   | 73.7(3)   | N(9)–Pb(2)–O(8)     | 71.7(3)   |
| N(9)–Pb(2)–N(7)     | 64.4(3)   | O(8)–Pb(2)–N(7)     | 77.4(3)   |
| N(9)–Pb(2)–N(5)     | 127.7(3)  | O(8)–Pb(2)–N(5)     | 66.3(3)   |
| N(7)–Pb(2)–N(5)     | 77.0(3)   | O(9)–Pb(2)–N9       | 61.02(3)  |
| O(8)–Pb(2)–O(9)     | 88.36(3)  | O(9)–Pb(2)–N(5)     | 142.79(3) |
| O(9)–Pb(2)–N(7)     | 125.33(3) | N(2)#3–Pb(3)–O(12)  | 73.9(3)   |
| N(2)#3–Pb(3)–N(8)   | 120.7(3)  | O(12)–Pb(3)–N(8)    | 67.6(3)   |
| N(2)#3–Pb(3)–N(1)#3 | 63.4(3)   | O(12)–Pb(3)–N(1)#3  | 90.3(3)   |
| N(8)–Pb(3)–N(1)#3   | 73.4(3)   | O(1)–Pb(3)–O(5)     | 60.21(3)  |
| O(12)–Pb(3)–O(1)    | 71.28(3)  | O(1)–Pb(3)–N(2) #3  | 61.78(3)  |
| O(1)–Pb(3)–N(1)#3   | 125.0(3)  | N(8)–Pb(3)–O(1)     | 134.95(3) |
| O(5)–Pb(3)–N(8)     | 141.52(3) | N(1)#3–Pb(3)–O(5)   | 132.67(3) |
| O(5)–Pb(3)–O(12)    | 127.73(3) | N(2)#3–Pb(3)–O(5)   | 97.67(3)  |
| <b>Compound 3</b>   |           |                     |           |
| Pb(1)–N(2)#1        | 2.332(5)  | Pb(1)–O(1)          | 2.493(5)  |
| Pb(1)–O(4)#2        | 2.490(5)  | Pb(1)–N(3)#1        | 2.603(7)  |
| Pb(1)–O(4)#1        | 2.815(7)  | Pb(1)–N(1)          | 2.806(5)  |
| N(2)#1–Pb(1)–O(1)   | 79.85(19) | N(2)#1–Pb(1)–O(4)#2 | 73.77(18) |

---

|                     |            |                     |            |
|---------------------|------------|---------------------|------------|
| O(1)–Pb(1)–O(4)#2   | 152.57(19) | N(2)#1–Pb(1)–N(3)#1 | 65.46(19)  |
| O(1)–Pb(1)–N(3)#1   | 87.4(2)    | O(4)#2–Pb(1)–N(3)#1 | 75.0(2)    |
| O(4)#1–Pb(1)–N(2)#1 | 61.12(2)   | O(4)#1–Pb(1)–O(1)   | 84.94(18)  |
| O(4)#1–Pb(1)–O(4)#2 | 88.82(17)  | O(4)#1–Pb(1)–N(1)   | 141.42(19) |
| N(3)#1–Pb(1)–O(4)#1 | 126.57(5)  | N(3)#1–Pb(1)–N(1)   | 76.47(3)   |
| N(1)–Pb(1)–O(1)     | 63.7(17)   | N(1)–Pb(1)–O(4)#2   | 129.34(19) |
| N(2)#1–Pb(1)–N(1)   | 127.89(17) |                     |            |

“Symmetry codes: compound **1**: #1  $-x + 1, y + 1/2, -z + 1/2$ ; #2  $-x + 1, -y + 1, -z$ ; #3  $x - 1/2, -y + 3/2, -z$ . compound **2**: #1  $-x + 2, -y + 1, -z + 1$ ; #2  $-x + 2, y + 1/2, -z + 1/2$ ; #3  $-x + 1, -y + 1, -z$ . compound **3**: #1  $-y + 5/4, x + 3/4, z - 1/4$ ; #2  $x, y + 1/2, -z + 1$ .

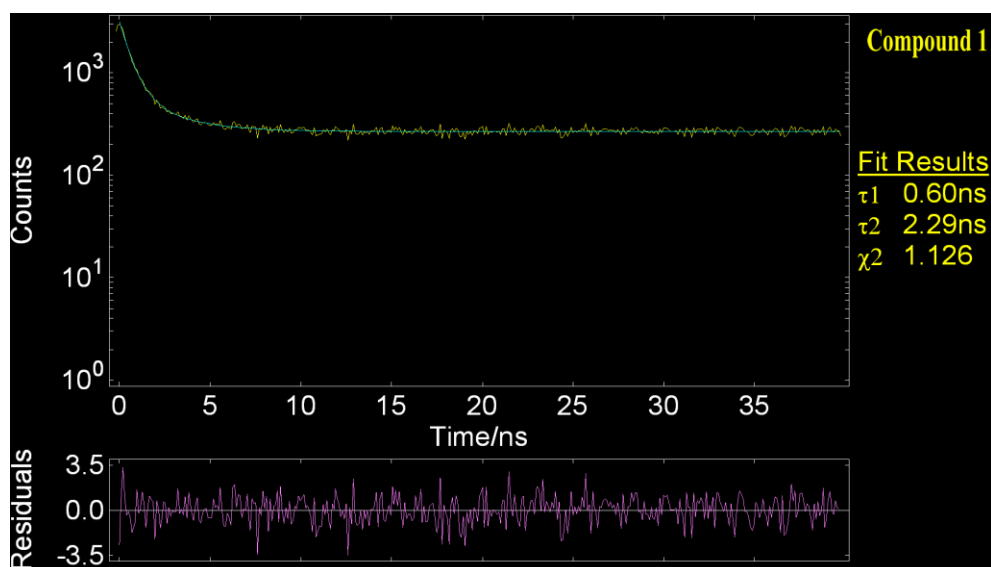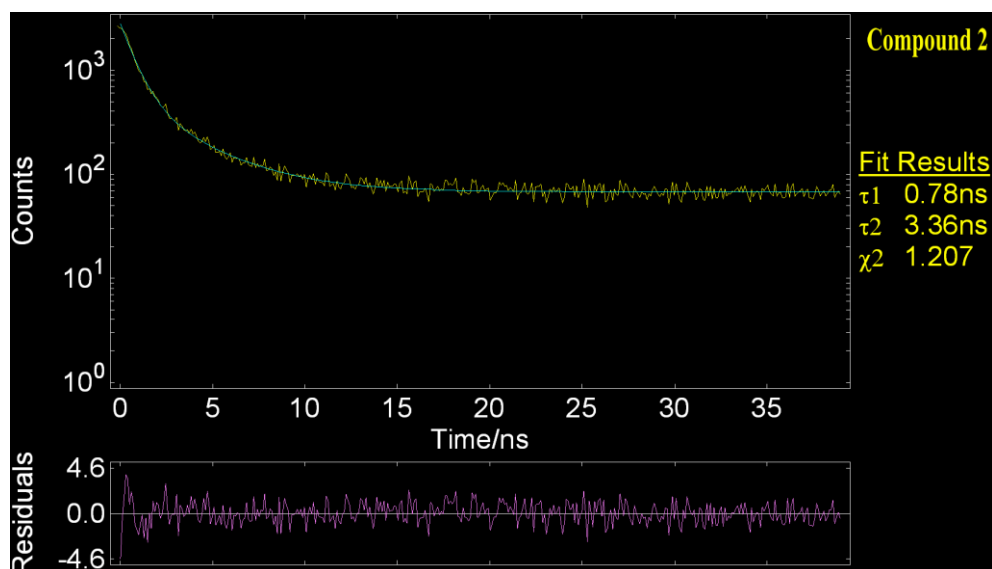

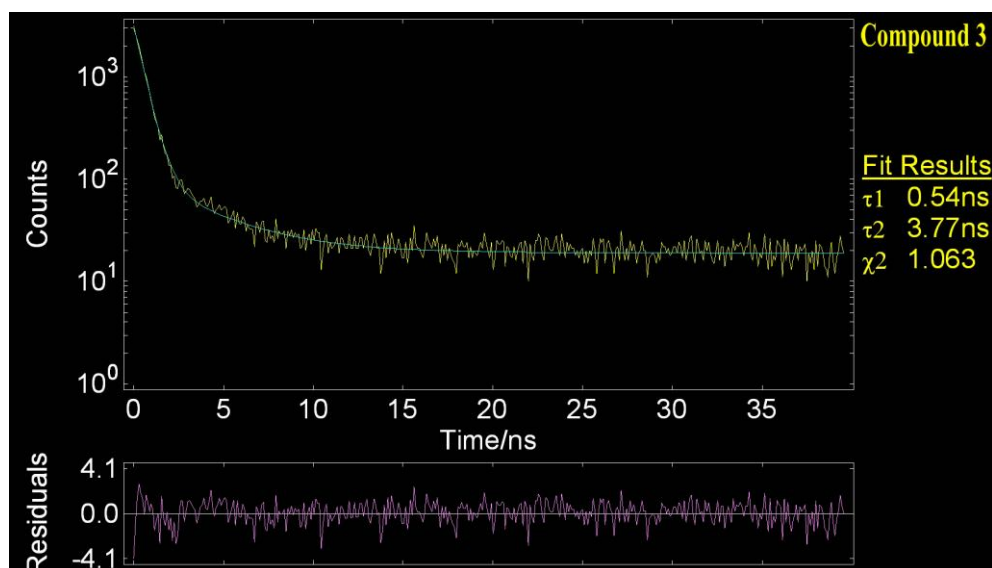

Fig S1. The emission lifetime of **1** – **3** fits a double-exponential decay.

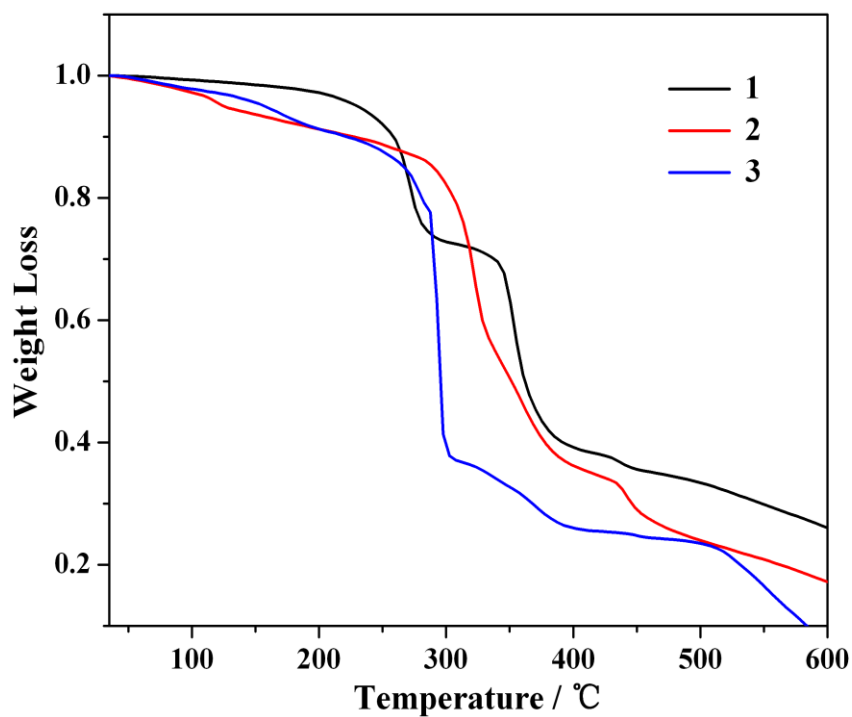

Figure S2. TGA curves of **1** – **3**.

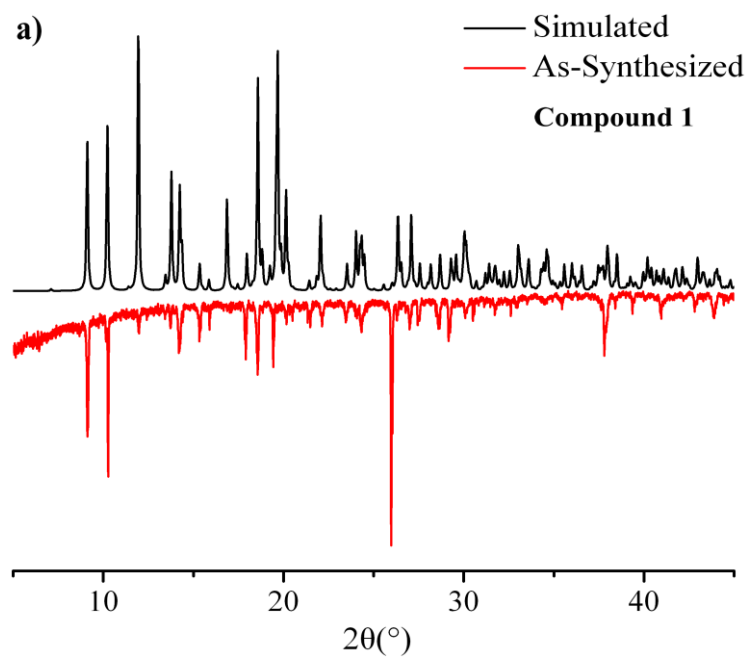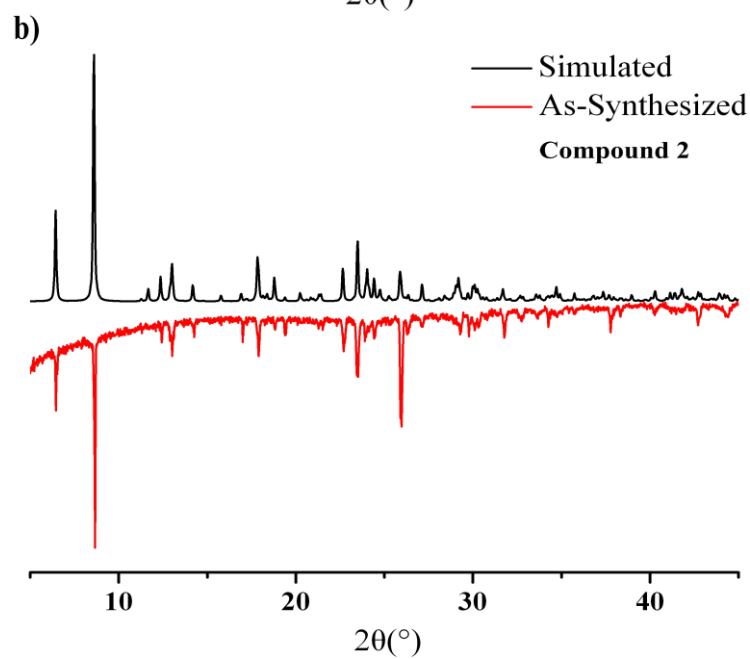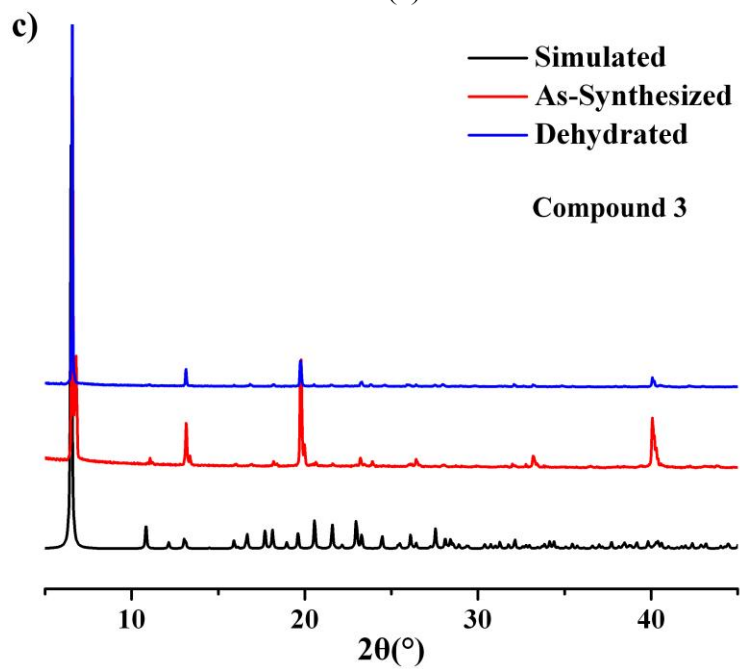

**Figure S3.** PXRD patterns of **1–3** simulated from the X-ray single-crystal structures and as-synthesized samples.

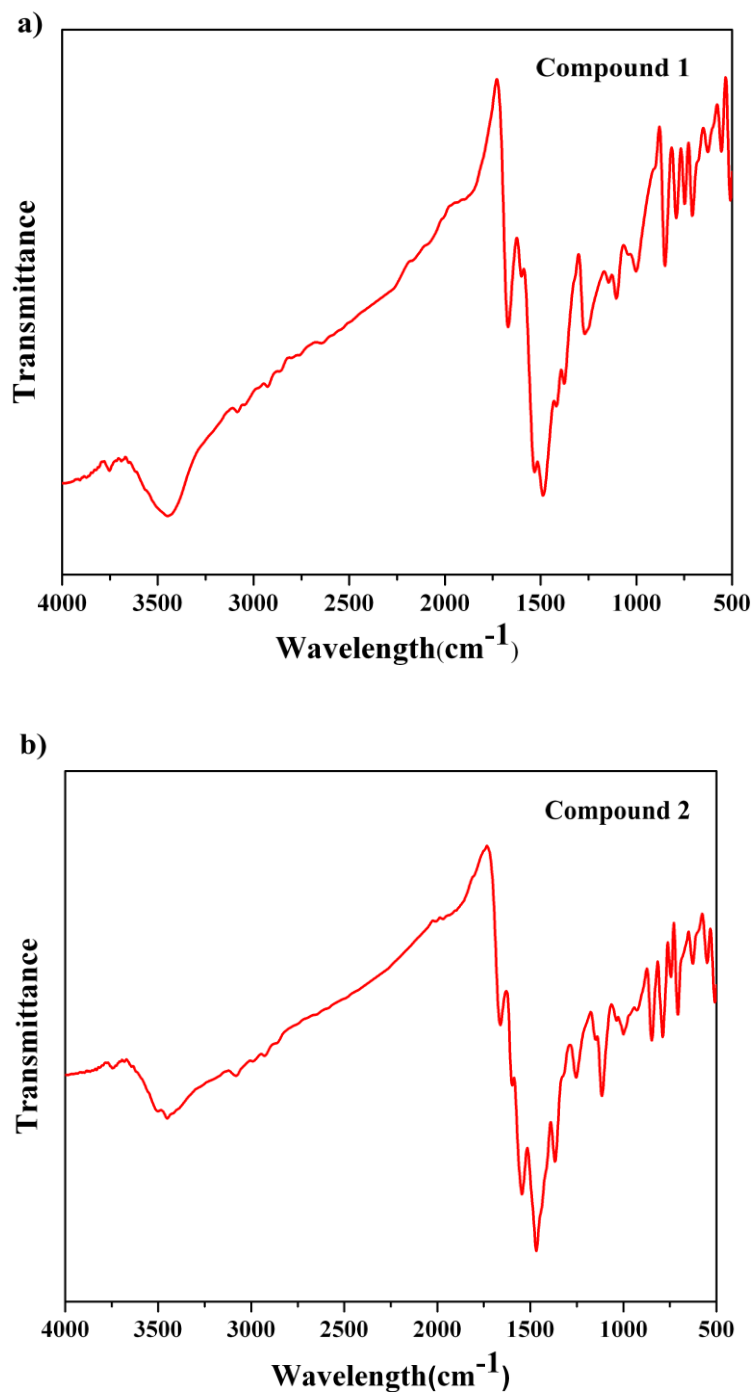

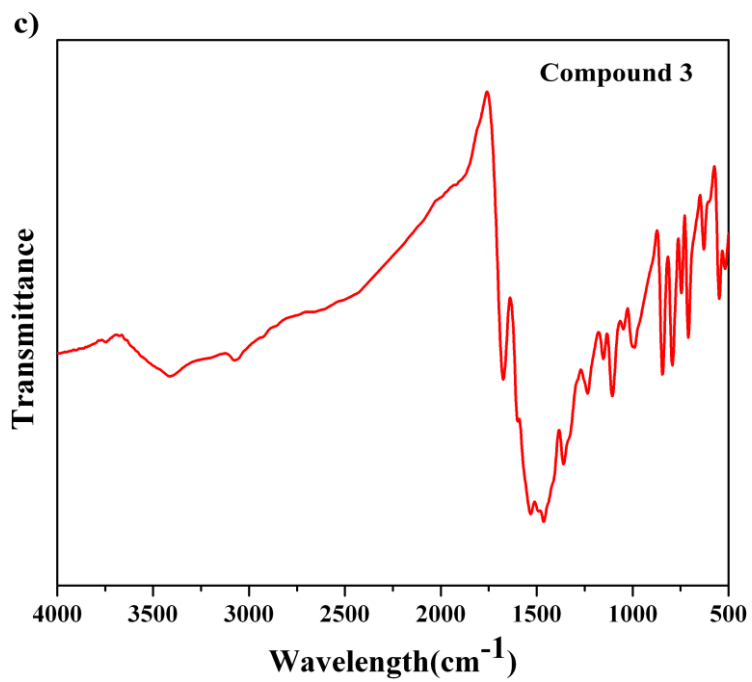

Figure S4. IR spectrum of 1–3 at room temperature.

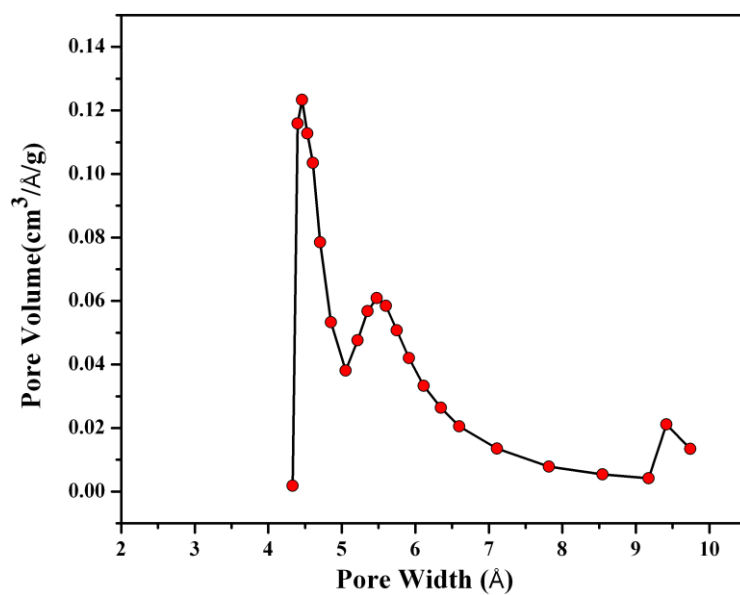

Figure S5. Pore size distribution of 3 calculated from the Horvath–Kawazoe (H–K) model.



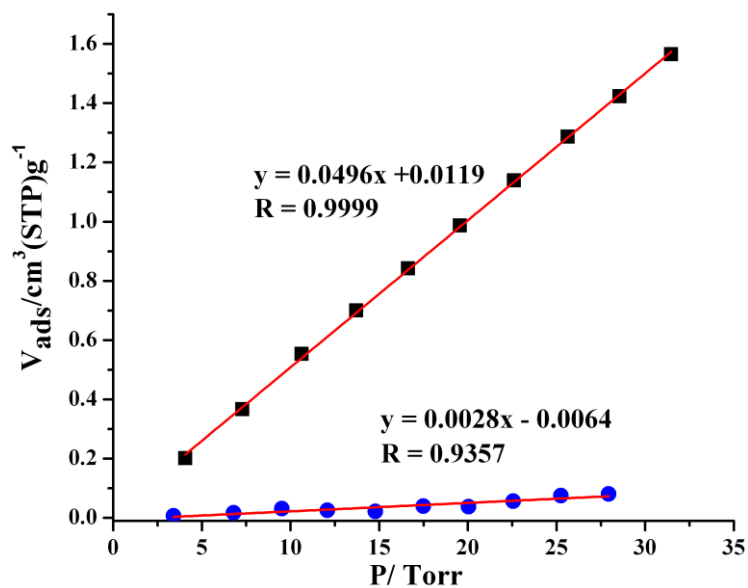

**Figure S6.** Initial slope calculation for CO<sub>2</sub> and N<sub>2</sub> isotherms collected at 293K (CO<sub>2</sub>: black squares; N<sub>2</sub>: blue circles)

### Calculation of sorption heat for CO<sub>2</sub> uptake using Virial 2 model

The CO<sub>2</sub> adsorption isotherm data for **3** at 273 and 293 K were fitted using the Virial 2 expression, where  $P$  is the pressure,  $N$  is the adsorbed amount,  $T$  is the temperature,  $a_i$  and  $b_i$  are virial coefficients, and  $m$  and  $n$  are the number of coefficients used to describe the isotherms.  $Q_{st}$  is the coverage - dependent enthalpy of adsorption and  $R$  is the universal gas constant.

$$\ln P = \ln N + 1/T \sum_{i=0}^m a_i N^i + \sum_{i=0}^n b_i N^i \quad Q_{st} = -R \sum_{i=0}^m a_i N^i$$

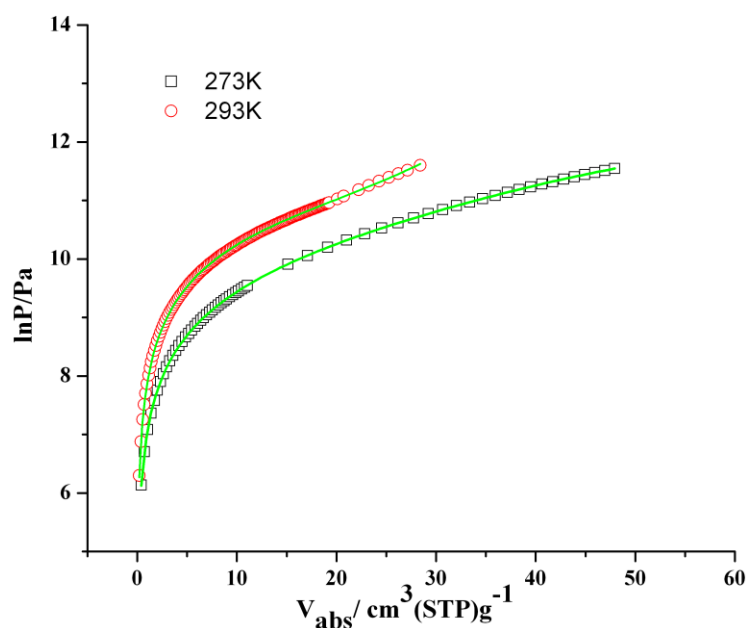

**Figure S7.** CO<sub>2</sub> adsorption isotherms for 3 with fitting by Virial 2 model. Fitting results:  $a_0 = -3339.70214 \pm 12.12776$ ,  $a_1 = -19.63059 \pm 3.64291$ ,  $a_3 = 4.7942 \pm 0.29431$ ,  $a_4 = -0.000024 \pm 0.000007$ ,  $b_0 = 19.27005 \pm 0.04234$ ,  $b_1 = 0.08149 \pm 0.01271$ ,  $b_2 = -0.01757 \pm 0.00102$ ,  $b_3 = 0.00056 \pm 0.00002$ .  $\chi^2 = 0.00003$ ,  $R^2 = 0.99998$ .
